## 1 **Evaluation of saliva self-collection devices for SARS-CoV-2 diagnostics**

2 Orchid M. Allicock<sup>1\*</sup>, Mary E. Petrone<sup>1\*</sup>, Devyn Yolda-Carr<sup>1\*</sup>, Mallery Breban<sup>1</sup>, Hannah  
3 Walsh<sup>2</sup>, Anne E. Watkins<sup>1</sup>, Jessica E. Rothman<sup>1</sup>, Shelli F. Farhadian<sup>2</sup>, Nathan D.  
4 Grubaugh<sup>1</sup>, Anne L. Wyllie<sup>1a</sup>

5  
6 <sup>1</sup>Department of Epidemiology of Microbial Diseases, Yale School of Public Health, New  
7 Haven, CT 06510, USA

8 <sup>2</sup>Department of Medicine, Section of Infectious Diseases, Yale School of Medicine, New  
9 Haven, CT, 06510, USA

10

11 \* These authors contributed equally

12 <sup>a</sup>Correspondence: Anne L. Wyllie ([anne.wyllie@yale.edu](mailto:anne.wyllie@yale.edu))

13

14

### 15 **Summary**

16 There is an urgent need to expand testing for SARS-CoV-2 and other respiratory  
17 pathogens as the global community struggles to control the COVID-19 pandemic.  
18 Current diagnostic methods can be affected by supply chain bottlenecks and require the  
19 assistance of medical professionals, impeding the implementation of large-scale testing.  
20 Self-collection of saliva may solve these problems, as it can be completed without  
21 specialized training and uses generic materials. In this study, we observed thirty  
22 individuals who self-collected saliva using four different collection devices and analyzed  
23 their feedback. Two of these devices, a funnel and bulb pipette, were used to evaluate  
24 at-home saliva collection by 60 individuals. All devices enabled the safe, unsupervised  
25 self-collection of saliva. The quantity and quality of the samples received were  
26 acceptable for SARS-CoV-2 diagnostic testing, as determined by RNase P detection.  
27 Here, we demonstrate inexpensive, generic, buffer free collection devices suitable for  
28 unsupervised and home saliva self-collection.

29

## 30 **Introduction**

31 Over a year since COVID-19 was declared a pandemic, the demand for testing remains  
32 high. Even with the rollout of several vaccines, successful control strategies still depend  
33 upon the availability of reliable, scalable testing programs. Self-collection of saliva for  
34 SARS-CoV-2 testing can facilitate these. Numerous studies have shown that saliva is  
35 an equally sensitive substrate for the detection of SARS-CoV-2 RNA as nasopharyngeal  
36 swabs (Hanson et al., 2020; Tan et al., 2021; Vogels et al., 2020; Wong et al., 2020;  
37 Wyllie et al., 2020). Unlike sampling with nasopharyngeal swabs, self-collection of saliva  
38 is non-invasive and does not require specialized training to perform (Marty et al., 2020).  
39 Moreover, SARS-CoV-2 RNA is stable in saliva at a broad range of temperatures and  
40 for an extended period of time, obviating the need for cold chain storage and  
41 preservatives or buffers that increase the costs of collection (Ott et al., 2021).

42  
43 While saliva has been used as a diagnostic testing substrate for pathogenic antibodies  
44 (Drobnik et al., 2011; Korhonen et al., 2014; Reynolds and Muwonga, 2004), its utility in  
45 viral pathogen detection has been limited to viruses like human immunodeficiency virus  
46 (Yapijakis et al., 2006), measles, mumps, and rubella (Jin et al., 2002), human  
47 papillomavirus (Adamopoulou et al., 2008), Epstein-Barr virus (Idesawa et al., 2004)  
48 and certain viral co-infections (Kim et al., 2017; Robinson et al., 2008; Yoon et al., 2017),  
49 all strictly in research settings. Before 2020, the only PCR-based diagnostic test using  
50 saliva (saliva swabs) approved or authorized by the FDA was for the detection of human  
51 cytomegalovirus in babies (FDA, 2018). Through the development of saliva-based  
52 diagnostic tests, COVID-19 testing became more accessible.

53  
54 Despite its advantages, if saliva is collected improperly, it is difficult to handle in the  
55 laboratory (Landry et al., 2020). Improper self-collection may also pose a safety risk if  
56 potentially biohazardous materials are mishandled. Therefore, it is essential that self-  
57 collection of saliva is safe and can produce testable samples. Equally important is  
58 establishing the acceptability of self-collection among the general public because  
59 methods that are deemed uncomfortable, difficult, or confusing are unlikely to gain  
60 traction in the population.

61

62 In this study, we evaluated the experience of thirty individuals who self-collected saliva  
63 using four different saliva collection devices: a P1000 pipette tip, a Salimetrics Saliva  
64 Collection Aid (Salimetrics LLC, Pennsylvania, USA), a funnel, and a bulb pipette  
65 (**Figure 1a**). We found that all four devices enabled the consistent and safe collection of  
66 true saliva that was acceptable for SARS-CoV-2 diagnostic testing with a RT-qPCR-  
67 based assay (Vogels et al., 2020). Using this information we next evaluated the  
68 suitability of both a funnel and a bulb pipette for unsupervised at-home saliva collection.  
69 Our findings demonstrate the suitability of multiple device options for use in saliva self-  
70 collection kits. This variety not only helps to avoid supply chain bottlenecks but could  
71 also promote broader acceptance of this method by improving the ease of self-collection  
72 and of sample processing in the laboratory.

73

## 74 **RESULTS**

75 **All four saliva collections devices were deemed usable by the study participants,**  
76 **but individual preference influenced their relative acceptability.** We aimed to enroll  
77 participants who represented a range of racial and educational backgrounds (**Table 1**).  
78 In 100% of the observed collections, study participants appeared confident in their  
79 ability to complete the collection correctly (**Figure S2**). The majority of participants (93%)  
80 understood the importance of following the instructions carefully to avoid incorrect test  
81 results, and during only two collections (1.67%), participants appeared to not  
82 adequately follow these instructions for proper sample collection (**Figure S2b**).

83

84 Of the 10 participant survey questions, only Question 5 (“Was collecting the sample  
85 difficult in general?”) varied statistically significantly across devices; however, this  
86 question was found to not be internally reliable (**Table S1, S2**). In this case, the bulb  
87 pipette scored the least favorably (mean = 3.1) compared to the other devices (pipette  
88 tip, mean = 2; funnel, mean = 2.3; collection aid, mean = 1.7) (**Figure S2**). Participants  
89 commented that the bulb pipette introduced bubbles and caused discomfort if it  
90 suctioned the inside of their mouth (**Table 2**). Despite this feedback, all participants

91 provided a sufficient volume of saliva for testing with all four devices, the majority did  
 92 not think they required assistance during the sample collection (93%), and in only 18  
 93 collections (16%), participants did not feel confident that they had collected the sample  
 94 correctly with the bulb pipette (**Figure 1**). Similarly, observers reported that the majority  
 95 of participants did not appear to struggle with the collection process (115/120, 95.8%,  
 96 **Figure S2b**).  
 97

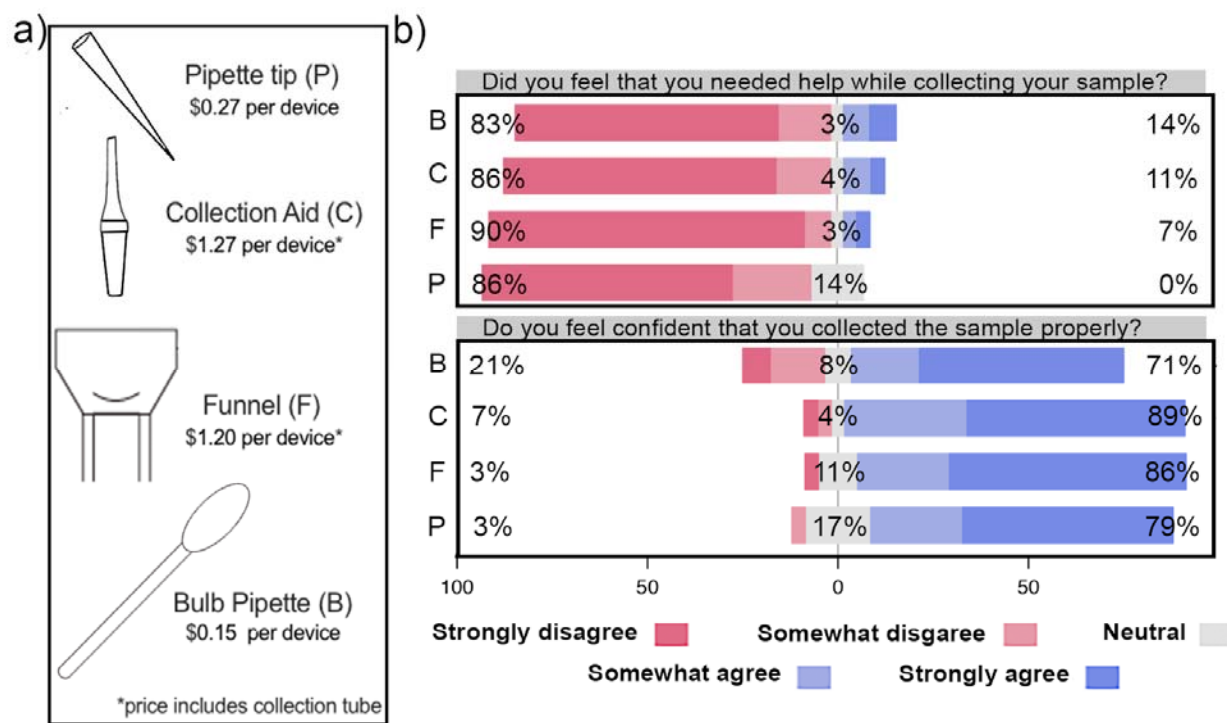

**Figure 1: Collection devices are inexpensive, easy to use, and yield testable samples.** Survey responses were reported from strongly disagree to strongly agree. (a) The four collection devices tested are inexpensive and provide users with a range of features to choose from. Prices at time of publication are shown in US dollars. (b) Participants reported being self-sufficient and confident in their ability to correctly collect saliva samples (from **Figure S2**). The questions are displayed above the corresponding graphs. The percentage response value for each device is shown above each bar. Two sets of participant responses were excluded because one participant did not provide a response for all four devices and one did not understand the response scale. *Abbreviations: P = pipette tip, C = collection aid,*

*F = funnel, B = bulb pipette.*

98

99 In addition to answering the survey questions, participants were given the opportunity to  
 100 provide general feedback. Each device received a range of comments from participants  
 101 reflecting differences in personal preference (**Table 2**). For example, though the bulb  
 102 pipette received the largest number of negative comments (n=11), one participant  
 103 stated it was their favorite of the four devices. Interestingly, there was no general  
 104 consensus around an overall preferred device; however, the size of the devices was a  
 105 common theme among participant feedback. Some participants (4/30, 13%) found the  
 106 pipette tip and collection aid to be too small, whereas the large size of the funnel and its  
 107 collection tube were noted to be an advantage. More research is needed to determine  
 108 which types of devices may be most suitable for specific demographic groups, but it is  
 109 likely that providing a range of options will promote the general acceptability of saliva  
 110 self-collection for pathogen diagnostic testing.

111

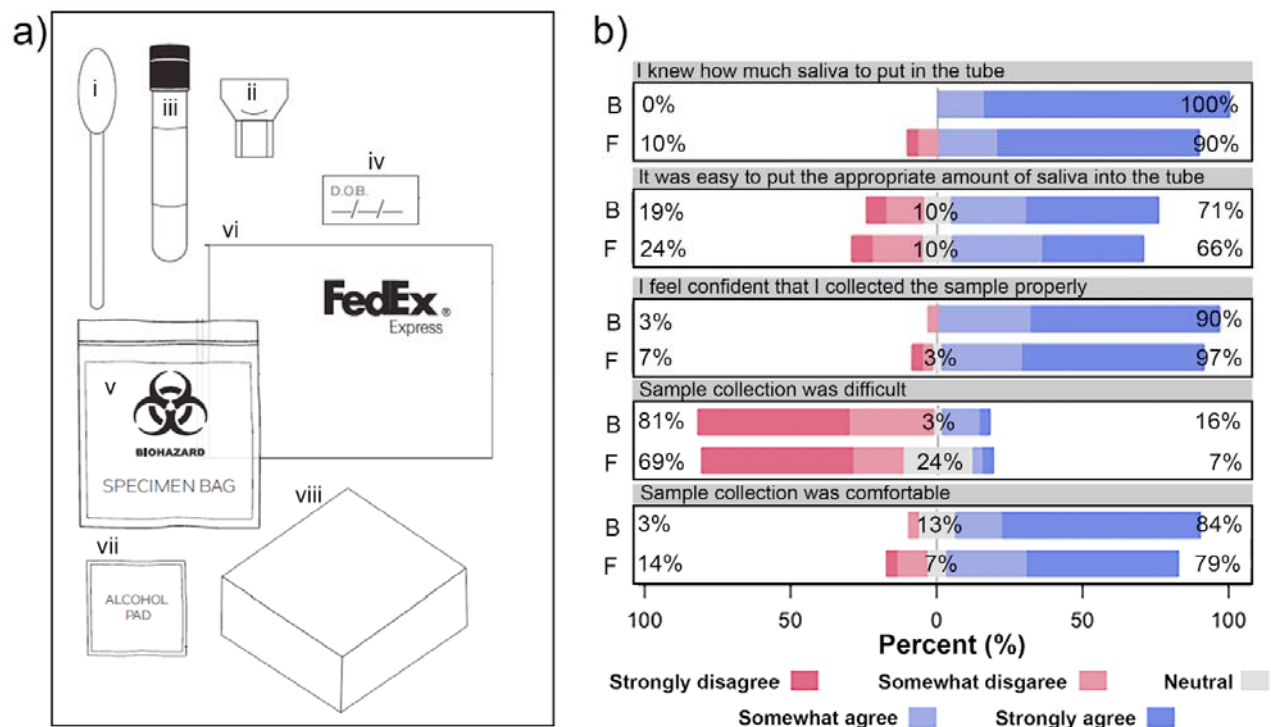

**Figure 2. At-home saliva collection kit components suitable for sample collection. a)**

Each of the participants were sent an at-home collection kit comprised of either a funnel (i) or bulb pipette (ii) with a labeled screw-cap tube (iii), patient identifier sticker (iv), biohazard collection bag with absorbent sheet (v), FedEx UN 3373 Pak (vi), an alcohol pad (vii), and box for return shipment (viii). **b)** Participant confidence in at-home self-collection of saliva when using either a funnel or bulb pipette (from **Figure S4**). Survey responses were reported on a scale of 1 (strongly disagree) to 5 (strongly agree). Overall, there was no significant difference between the collection devices in relation to the participant's confidence and ability to use either device. The questions are displayed above the corresponding graphs. *Abbreviations: F = funnel, B = bulb pipette.*

112

113 **Unsupervised saliva collection can be reliably conducted at home.** In order to  
114 achieve diversity in the demographics of the participants, we selected 84 of the 246  
115 participants who consented to unsupervised at-home saliva collection study, based on  
116 age, sex, race and educational status. The participants were sent self-collection kits  
117 containing either a funnel (n=43) or bulb transfer pipette (n=41) to aid saliva collection.  
118 Of those distributed, 66 kits were returned, however 6 participants did not complete the  
119 survey, so were excluded from the study. Overall, survey responses following  
120 unsupervised collection were favorable (**Figure 2b, Figure S4**). Participants reported  
121 feeling confident with carrying out self-collection properly and that the process was not  
122 difficult. Importantly, study participants clearly understood the required process of  
123 sample collection, with 100% of participants acknowledging that they understood not to  
124 eat/drink/smoke prior to collecting the sample, and 88.33% understood that incorrect  
125 sampling could result in false results (**Figure S4**). There were slight differences in the  
126 user experience between bulb pipette kits and the funnel kits; 16% of the participants  
127 found that the sample collection was difficult with the bulb pipette as compared to only 7%  
128 of the participants using the funnel.

129

130 **Self-collection of saliva was safe and yielded testable samples.** Ensuring the  
131 proper handling of potentially biohazardous material is an essential consideration for



132 saliva self-collection to be implemented on a large scale. Specifically, contamination of  
133 the collection tube with virus-infected saliva poses the greatest health and safety risk for  
134 this method.

135  
136 Some participants did contaminate the outside of their collection tubes with saliva during  
137 the pilot collection (27.8%) and the at-home kit study (21.7%), but participants from the  
138 pilot study were observed sanitizing the collection tube with an alcohol wipe in  
139 accordance with the provided instructions and the majority of at-home study participants  
140 reported understanding what to do in this situation. Additionally, as directed in the  
141 written instructions, 87% of participants in the pilot study washed or sanitized their  
142 hands before and after completing the collections. Regardless, strict sample handling  
143 safety precautions should be applied by all testing laboratories when receiving any  
144 clinical sample type.

145  
146 Our secondary objective was to compare the quality of samples collected using each  
147 device. We found that all of the samples received (both unobserved as well as  
148 unsupervised at-home self-collection) were of sufficient quality for testing with  
149 SalivaDirect (Vogels et al., 2020), demonstrating how true saliva, which naturally pools  
150 in the mouth, can be easily handled in the laboratory. Specifically, laboratory survey  
151 responses confirmed that 100% of the samples collected during the pilot study were  
152 easy to pipette and of sufficient volume (>0.5 mL) (**Figure 3, Figure S3**). Slight  
153 discoloration was noted in 18 samples (15%) and food particles were observed in 20  
154 samples (5 participants, 16.7%), but these did not affect test results. No sample tested  
155 positive for SARS-CoV-2. The average cycle threshold (Ct) value for the negative  
156 control, RNase P (RP), was within the expected range (23-28 Cts) (Wyllie et al., 2020)  
157 for the majority of samples from the pilot study (73%), indicating that the use of different  
158 collection methods did not interfere with the diagnostic assay (**Figure 3**). We did not find  
159 a significant difference between matched samples across devices using one-way  
160 ANOVA (**Figure. S3**).

161

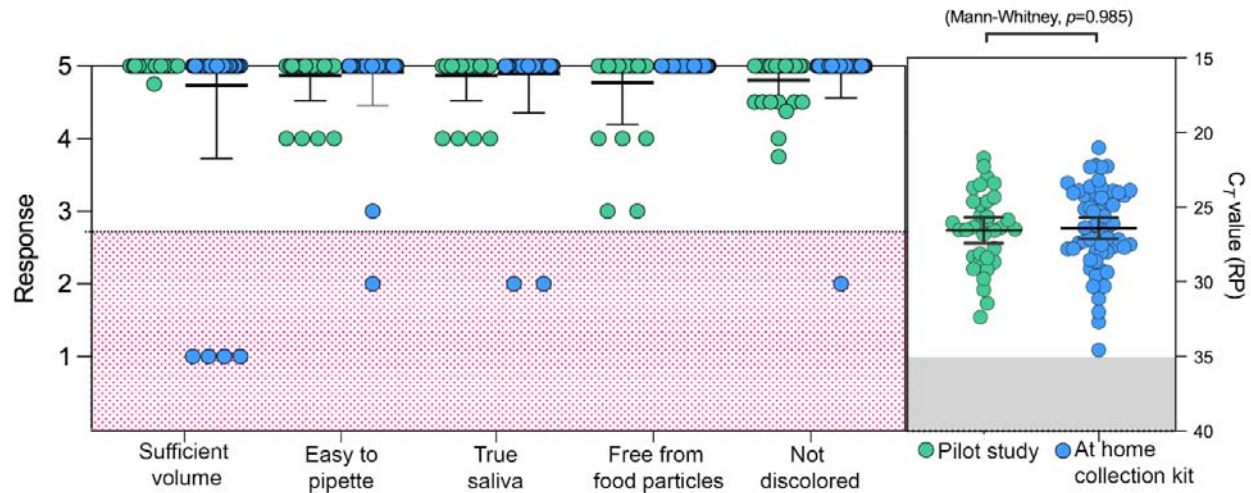

**Figure 3 The quality of the samples was adequate for testing with a PCR-based assay.** Laboratory survey questions pertaining to the quality of the samples are shown on the x-axis (from **Figures S3, S5**). Data points represent the mean response, green dots represent samples collected from the pilot study and blue dots represent samples collected from the at-home collection kit. Survey responses were reported on a scale of 1 (strongly disagree) to 5 (strongly agree). Samples with less favorable responses are highlighted in red. Mean and standard deviation (st. dev.) are shown in black. The graph on the right shows the cycle threshold (Ct) values for the internal control RNase P (RP) from each of the saliva samples submitted. The blue and green dots represent Ct value per participant. Ct values over 35 are considered invalid and is highlighted in gray. P-value is shown using one-way Mann-Whitney. Mean and standard deviation (st. dev.) are shown in black.

162  
163 The overall quality of the saliva samples from the at-home kit study was also acceptable,  
164 but with slight differences between the two collection devices. Of the 60 samples  
165 returned, 6.7% (n=4) contained less than 0.5 mL saliva (half of the 1 mL tube provided),  
166 all from participants given the bulb pipette collection kit (**Figure 3, Figure S4**). Despite  
167 this, all 4 samples were sufficient for testing, containing 100-450  $\mu$ L of saliva. Besides  
168 low volume, the quality of the samples collected with the bulb pipette was high, with 100%  
169 of samples easy to pipet, free from food particles, not discolored and consisting of only  
170 true saliva. On the other hand, while 100% of the samples returned from the participants



171 with the funnel collection kit were of sufficient volume, 2/29 samples might not have  
172 been “true saliva” and as a result were difficult to pipet. In addition, one of the samples  
173 was slightly discolored.

174

175

## 176 **Discussion**

177 To combat the ongoing outbreaks of SARS-CoV-2, mass testing strategies which are  
178 cost-effective and free from supply chain disruptions are essential. Additional major  
179 barriers to frequent testing result from a need to schedule appointments at facilities  
180 staffed with trained personnel or testing aversion to swab-based methods. Scaling up  
181 the use of saliva self-collection as a routine diagnostic tool can expand access to testing  
182 for SARS-CoV-2 and could be reliably performed in workplaces, schools or college  
183 dormitories where regular testing is essential for safe day-to-day operations. To support  
184 these efforts, we aimed to identify saliva collection solutions with generic components  
185 without sacrificing the comfort of the participants or the effectiveness of collection.  
186 Results from this study demonstrate the usability and efficacy of several simple saliva  
187 collection methods for SARS-CoV-2 detection. Importantly, all of the devices promoted  
188 the collection of “true” saliva, which was acceptable for handling in the laboratory, and  
189 were deemed usable by our participants.

190

191 The data collected from the pilot study was used to inform our selection of the bulb  
192 pipette and funnel as the saliva collection devices for the at-home saliva collection kits.  
193 Though there was no clear preference in devices based on demographic factors like sex,  
194 education level, ethnicity or age, some of the older participants had issues with saliva  
195 collection using the bulb pipette. More studies can be done to specifically assess the  
196 usability of the collection devices in these specific populations. The availability of the  
197 option for unsupervised sample collection for COVID-19 testing could result in up to  
198 one-third more symptomatic persons seeking testing, especially in those populations of  
199 individuals who are at high risk for contracting the infection, or those who are  
200 unable/unwilling to go into clinical settings (Siegler et al., 2020). With more options  
201 available, individuals can select kits according to their needs and limitations.

202

203 We did not directly compare the self-collection process with the aid of a collection  
204 device to the process without a device, but the ability to collect true saliva in simple wide  
205 mouth tubes has been previously demonstrated (Byrne et al., 2020; Wyllie et al., 2020).  
206 Wide-mouth tubes are not conducive for large-scale testing in labs with limited space or  
207 when sample processing requires the use of a liquid-handling robot, a piece of  
208 equipment present in most large clinical laboratories. Therefore, the collection devices  
209 we tested allow for an easy collection process into smaller tubes that are likely more  
210 amenable to the majority of laboratory procedures. Importantly, results from our study  
211 also demonstrate that these devices do not inhibit RNA-extraction free, RT-qPCR based  
212 diagnostic assays.

213

214 This study also evaluated the instructions for reliable saliva self-collection. The majority  
215 of the participants had no additional feedback, and the few comments we did receive  
216 were all related to the kit instructions, involving font size, mailing instructions and device  
217 assembly (see table 3). This slight confusion was reflected in the participant survey  
218 responses, where 35% of participants were unsure of what to do if saliva came into  
219 contact with the outside of the tube and 26% were unsure of what to do if they had any  
220 questions. This feedback highlighted the need to further refine the instructions in order  
221 to decrease the likelihood of errors in saliva collection and improve the sample  
222 collection experience. Additionally, visual materials such as a video outlining the sample  
223 collection and shipping process could be helpful in future iterations of the kits.

224

225 Even with ongoing vaccination campaigns, widespread, routine testing for SARS-CoV-2  
226 will remain a staple of public health disease control strategies for at least another year.  
227 For this, unsupervised saliva collection permits feasible, scalable, and affordable testing  
228 solutions.

229

### 230 **Limitations of the study**

231 While the sample size of the pilot study was small, and a majority of study participants  
232 held a college degree or higher, similar results were obtained when we enrolled a larger,

233 more demographically diverse cohort for the unsupervised, at-home evaluation. It is  
234 important to note that we did not enroll individuals under the age of 18 and therefore  
235 cannot draw conclusions around the usability of these devices in children. However,  
236 large-scale pathogen surveillance testing involving self-collected saliva samples from  
237 school-aged children have been executed for SARS-CoV-2 and other pathogens  
238 (*Streptococcus pneumoniae*) (Bi et al., 2021; Wyllie et al., 2014).

239  
240 Overall, the response to the collection devices were favorable. However the sample size  
241 was too small to determine if there are age-specific preferences in collection devices.  
242 More studies can be done to assess the utility of different collection devices in select  
243 populations.

244

#### 245 **Data and Code Availability**

246 De-identified survey responses and source data are available at  
247 doi:10.17632/x2mv2ctm7c.1 and in the supplement.

248

#### 249 **Author contributions**

250 A.L.W. and N.D.G. conceived the study. H.W., M.E.P. and S.F.F. assisted with the  
251 coordination and execution of the study. M.E.P, O.M.A., D.Y-C., and M.B. observed the  
252 collections. M.B., D.Y-C., O.M.A. and A.E.W. performed the diagnostic tests. M.E.P.,  
253 O.A. and D.Y-C. analyzed the data. J.E.R. assisted with the design of the statistical  
254 analysis. M.E.P., O.A., D.Y-C., N.D.G., and A.L.W. wrote and edited the manuscript.

255

#### 256 **Acknowledgements**

257 We thank the study participants for their time and cooperation. We also thank Una Pipic,  
258 Jessica Metti, Monisha Appalarju and the team at Tempus for their support. This work  
259 was funded by Tempus Labs, Inc (N.D.G and A.L.W), Yale Center for Clinical  
260 Investigation TL1 TR001864 (M.E.P.) and Fast Grant from Emergent Ventures at the  
261 Mercatus Center at George Mason University (N.D.G and A.L.W).

262

#### 263 **Declaration of interest**

264 N.D.G. is a paid consultant for Tempus. The remaining authors declare no competing  
265 interests.

266

## 267 **Figures**

268 **Figure 1: Collection devices are inexpensive, easy to use, and yield testable**

269 **samples.** Survey responses were reported from strongly disagree to strongly agree. (a)

270 The four collection devices tested are inexpensive and provide users with a range of

271 features to choose from. Prices at time of publication are shown in US dollars. (b)

272 Participants reported being self-sufficient and confident in their ability to correctly collect

273 saliva samples (from **Figure S2**). The questions are displayed above the corresponding

274 graphs. The percentage response value for each device is shown above each bar. Two

275 sets of participant responses were excluded because one participant did not provide a

276 response for all four devices and one did not understand the response scale.

277 *Abbreviations: P = pipette tip, C = collection aid, F = funnel, B = bulb pipette.*

278

279 **Figure 2. At-home saliva collection kit components suitable for sample collection.**

280 **a)** Each of the participants were sent an at-home collection kit comprised of either a

281 funnel (i) or bulb pipette (ii) with a labeled screw-cap tube (iii), patient identifier sticker

282 (iv), biohazard collection bag with absorbent sheet (v), FedEx UN 3373 Pak (vi), an

283 alcohol pad (vii), and box for return shipment (viii). **b)** Participant confidence in at-home

284 self-collection of saliva when using either a funnel or bulb pipette (from **Figure S4**).

285 Survey responses were reported on a scale of 1 (strongly disagree) to 5 (strongly

286 agree). Overall, there was no significant difference between the collection devices in

287 relation to the participant's confidence and ability to use either device. The questions

288 are displayed above the corresponding graphs. *Abbreviations: F = funnel, B = bulb*

289 *pipette.*

290

291 **Figure 3 The quality of the samples was adequate for testing with a PCR-based**

292 **assay.** Laboratory survey questions pertaining to the quality of the samples are shown

293 on the x-axis (from **Figures S3, S5**). Data points represent the mean response, green

294 dots represent samples collected from the pilot study and blue dots represent samples

295 collected from the at-home collection kit. Survey responses were reported on a scale of  
296 1 (strongly disagree) to 5 (strongly agree). Samples with less favorable responses are  
297 highlighted in red. Mean and standard deviation (st. dev.) are shown in black. The graph  
298 on the right shows the cycle threshold (Ct) values for the internal control RNase P (RP)  
299 from each of the saliva samples submitted. The blue and green dots represent Ct value  
300 per participant. Ct values over 35 are considered invalid and is highlighted in gray. P-  
301 value is shown using one-way Mann-Whitney. Mean and standard deviation (st. dev.)  
302 are shown in black.

303

## 304 **Tables**

305 **Table 1. Demographic characteristics of the participants from the pilot study and**  
306 **the at-home saliva kit study.**

307

308 **Table 2. Participant observations and experiences with the unobserved collection.**

309 Survey comments from participants from pilot study and the at-home collection kits. The  
310 comments presented here are representative but not exhaustive. *Abbreviations:* No. =  
311 number.

312

## 313 **Methods**

### 314 **Ethics**

315 This study was conducted in accordance with an Institutional Review Board protocol  
316 reviewed and approved by the Yale University Human Research Protection Program  
317 (IRB Protocol ID: 2000028394).

318

### 319 **Study design**

320 For the initial evaluation of unobserved saliva collection, thirty participants between the  
321 ages of 20 and 80 years were enrolled. Individuals who had previously provided a saliva  
322 sample, who had relevant, career-level laboratory experience, or who were  
323 experiencing symptoms of respiratory infection were excluded from enrollment. Once  
324 informed consent was provided, participants received a collection kit containing (1) the

325 four saliva collection devices (**Figure 1a**), (2) corresponding collection instructions, (3) a  
326 biohazard bag, and (4) five alcohol wipes. Participants self-collected four saliva samples  
327 consecutively and in a randomized order. Members of the study team observed these  
328 collections via a video platform with minimal interaction with the study participant. The  
329 observer turned off video and audio on their device for the duration of the four  
330 collections and provided no instructions on sample collection. Following each collection,  
331 both the observer and the study participant completed a survey about the experience,  
332 scoring responses on a scale of 1 (strongly disagree) to 5 (strongly agree) (**Figure S1**).

333  
334 An additional 60 participants were recruited into the study through an online, social  
335 media post to evaluate unsupervised at-home saliva collection. Participants were  
336 required to be at least 18 years of age, reside in the contiguous United States with no  
337 previous experience with providing saliva for diagnostic testing. Participants provided  
338 demographic data and were consented via an online form to limit direct contact with  
339 study participants, and to replicate an unsupervised at-home collection as closely as  
340 possible. Study participants were selected from consenting individuals to ensure a  
341 diverse range of age and race. Study participants were mailed an at-home self-  
342 collection kit containing a saliva collection device, a collection tube, collection  
343 instructions, a biohazard bag, an alcohol wipe and a FedEx envelope for sample return  
344 (**Figure 2a**). Samples returned to the laboratory were stored at 4°C for up to 4 days until  
345 testing.

346  
347 **Sample testing**  
348 All saliva samples (n = 183) were tested for a region of the SARS-CoV-2 nucleocapsid  
349 gene (N1) and human RNase P (RP) using the SalivaDirect protocol (Vogels et al.). A  
350 laboratory survey assessing the quality of each sample was completed by the  
351 technician during testing.

352  
353 **Statistical analysis**  
354 Participant, observer, and laboratory survey questions were tested for internal reliability  
355 with Cronbach's alpha using R v.4.0.2. Significant statistical differences across the 4



356 devices were calculated using one-way ANOVA in GraphPad v.8.4.3. Participants who  
357 did not provide a response for all four devices were excluded from the analysis for the  
358 corresponding question (maximum of 6 for question 10). For the laboratory surveys,  
359 responses to questions 2, 3, and 4 were identical across devices and therefore could  
360 not be assessed using one-way ANOVA. For the at-home self-collection of saliva, the  
361 differences between the bulb pipette and funnel kits were assessed using the Mann-  
362 Whitney test in GraphPad v.9.1.0.

363

## 364 **Supplementary Figures**

365 **Figure S1 Survey questions posed to participants, observers, and laboratory**  
366 **personnel.** For the pilot study, parts a), b) and c) were used. For the at-home kit, only  
367 a) and c) were used. Responses were given on a scale of 1 (strongly disagree) to 5  
368 (strongly agree).

369 **Figure S2 Responses to participant and observer surveys (related to Figure 1).**  
370 Mean and standard deviation are marked in pink. Survey data were analyzed using one-  
371 way ANOVA. Responses to two questions (P5 and O5) differed significantly across  
372 devices and are denoted with black boxes. The numbers shown on the x-axis of those  
373 graphs are the mean response value. *Abbreviations: P = pipette tip, C = collection aid, F*  
374 *= funnel, B = bulb pipette.*

375 **Figure S3 Responses to laboratory survey. P-values are shown for questions that**  
376 **could be assessed using one-way ANOVA.** Mean and standard deviation (st. dev.)  
377 are shown for questions where responses were identical across devices. *Abbreviations:*  
378 *P = pipette tip, C = collection aid, F = funnel, B = bulb pipette.*

379 **Figure S4 Responses to participant surveys for at home collection kit.** Mean and  
380 standard deviation are marked in pink. Survey data were analyzed using Mann-Whitney.  
381  $P < 0.05$  is significantly different. *Abbreviations: F = funnel, B = bulb pipette.*

382

383 **Figure S5 Responses to laboratory survey.** Mean and standard deviation are marked  
384 in pink. P-values are shown for questions that could be assessed using Mann-Whitney.  
385 Ct values over 35 are considered invalid and are highlighted in gray on L6.  
386 *Abbreviations: F = funnel, B = bulb pipette.*

387

## 388 **Supplementary Tables**

389 **Table S1** Internal reliability of survey question measured with Cronbach's alpha.

390 **Table S2** The majority of internally reliable survey questions did not differ significantly across  
391 collection devices. (a) Analysis of responses for participant and observer survey questions  
392 found to be internally reliable with Cronbach's alpha. (b) Analysis of laboratory survey  
393 responses.

394 **Table S3** Participant survey data for pilot study

395 **Table S4** Observation survey data for pilot study

396 **Table S5** Lab survey data for pilot study

397 **Table S6** Participant survey data for at home collection kit study

398 **Table S5** Lab survey data for at home collection kit study, including the ct values for the  
399 RNase P gene from the participant's saliva samples

400

## 401 **References**

402 Adamopoulou, M., Vairaktaris, E., Panis, V., Nkenke, E., Neukam, F.W., and Yapijakis,  
403 C. (2008). HPV detection rate in saliva may depend on the immune system efficiency. In  
404 *Vivo* 22, 599–602.

405 Bi, C., Mendoza, R., Cheng, H.-T., Pagaspas, G., Gabutan, E.C., Khan, N., Hoxie, H.,  
406 Holmes, K., Gao, N., Lewis, R., et al. (2021). Pooled surveillance testing program for  
407 asymptomatic SARS-CoV-2 infections in K-12 schools and universities. medRxiv.

408 Byrne, R.L., Kay, G.A., Kontogianni, K., Brown, L., Collins, A.M., Cuevas, L.E., Ferreira,  
409 D., Fraser, A.J., Garrod, G., Hill, H., et al. (2020). Saliva offers a sensitive, specific and  
410 non-invasive alternative to upper respiratory swabs for SARS-CoV-2 diagnosis.

411 medRxiv.

- 412 Drobnik, A., Judd, C., Banach, D., Egger, J., Konty, K., and Rude, E. (2011). Public  
413 health implications of rapid hepatitis C screening with an oral swab for community-  
414 based organizations serving high-risk populations. *Am. J. Public Health* *101*, 2151–2155.
- 415 FDA (2018). FDA authorizes first test to aid in detecting a type of herpes virus in  
416 newborns called cytomegalovirus.
- 417 Hanson, K.E., Barker, A.P., Hillyard, D.R., Gilmore, N., Barrett, J.W., Orlandi, R.R., and  
418 Shakir, S.M. (2020). Self-Collected Anterior Nasal and Saliva Specimens versus Health  
419 Care Worker-Collected Nasopharyngeal Swabs for the Molecular Detection of SARS-  
420 CoV-2. *J. Clin. Microbiol.* *58*.
- 421 Idesawa, M., Sugano, N., Ikeda, K., Oshikawa, M., Takane, M., Seki, K., and Ito, K.  
422 (2004). Detection of Epstein-Barr virus in saliva by real-time PCR. *Oral Microbiol.*  
423 *Immunol.* *19*, 230–232.
- 424 Jin, L., Vyse, A., and Brown, D.W.G. (2002). The role of RT-PCR assay of oral fluid for  
425 diagnosis and surveillance of measles, mumps and rubella. *Bull. World Health Organ.*  
426 *80*, 76–77.
- 427 Kim, Y.-G., Yun, S.G., Kim, M.Y., Park, K., Cho, C.H., Yoon, S.Y., Nam, M.H., Lee, C.K.,  
428 Cho, Y.-J., and Lim, C.S. (2017). Comparison between Saliva and Nasopharyngeal  
429 Swab Specimens for Detection of Respiratory Viruses by Multiplex Reverse  
430 Transcription-PCR. *J. Clin. Microbiol.* *55*, 226–233.
- 431 Korhonen, E.M., Huhtamo, E., Virtala, A.-M.K., Kantele, A., and Vapalahti, O. (2014).  
432 Approach to non-invasive sampling in dengue diagnostics: exploring virus and NS1  
433 antigen detection in saliva and urine of travelers with dengue. *J. Clin. Virol.* *61*, 353–358.
- 434 Landry, M.L., Criscuolo, J., and Peaper, D.R. (2020). Challenges in use of saliva for  
435 detection of SARS CoV-2 RNA in symptomatic outpatients. *J. Clin. Virol.* *130*, 104567.
- 436 Marty, F.M., Chen, K., and Verrill, K.A. (2020). How to Obtain a Nasopharyngeal Swab  
437 Specimen. *N. Engl. J. Med.* *382*, e76.

- 438 Ott, I.M., Strine, M.S., Watkins, A.E., Boot, M., Kalinich, C.C., Harden, C.A., Vogels,  
439 C.B.F., Casanovas-Massana, A., Moore, A.J., Muenker, M.C., et al. (2021). Stability of  
440 SARS-CoV-2 RNA in Nonsupplemented Saliva. *Emerg. Infect. Dis.* 27, 1146–1150.
- 441 Reynolds, S.J., and Muwonga, J. (2004). OraQuick ADVANCE Rapid HIV-1/2 antibody  
442 test. *Expert Rev. Mol. Diagn.* 4, 587–591.
- 443 Robinson, J.L., Lee, B.E., Kothapalli, S., Craig, W.R., and Fox, J.D. (2008). Use of  
444 throat swab or saliva specimens for detection of respiratory viruses in children. *Clin.*  
445 *Infect. Dis.* 46, e61–e64.
- 446 Siegler, A.J., Hall, E., Luisi, N., Zlotorzynska, M., Wilde, G., Sanchez, T., Bradley, H.,  
447 and Sullivan, P.S. (2020). Willingness to Seek Diagnostic Testing for SARS-CoV-2 With  
448 Home, Drive-through, and Clinic-Based Specimen Collection Locations. *Open Forum*  
449 *Infect Dis* 7, ofaa269.
- 450 Tan, S.H., Allicock, O., Armstrong-Hough, M., and Wyllie, A.L. (2021). Saliva as a gold-  
451 standard sample for SARS-CoV-2 detection. *The Lancet Respiratory Medicine*.
- 452 Vogels, C., Orchid, M., E., D., Chaney, C., Isabel, M., Grubaugh, N., and Anne, L.  
453 SalivaDirect™: RNA extraction-free SARS-CoV-2 diagnostics v6 ([protocols.io.btdnni5e](https://protocols.io/btdnni5e)).  
454 *Protocols.io*.
- 455 Vogels, C.B.F., Watkins, A.E., Harden, C.A., Brackney, D.E., Shafer, J., Wang, J.,  
456 Caraballo, C., Kalinich, C.C., Ott, I.M., Fauver, J.R., et al. (2020). SalivaDirect: A  
457 Simplified and Flexible Platform to Enhance SARS-CoV-2 Testing Capacity. *Med.*
- 458 Wong, S.C.Y., Tse, H., Siu, H.K., Kwong, T.S., Chu, M.Y., Yau, F.Y.S., Cheung, I.Y.Y.,  
459 Tse, C.W.S., Poon, K.C., Cheung, K.C., et al. (2020). Posterior Oropharyngeal Saliva  
460 for the Detection of Severe Acute Respiratory Syndrome Coronavirus 2 (SARS-CoV-2).  
461 *Clin. Infect. Dis.* 71, 2939–2946.
- 462 Wyllie, A.L., Chu, M.L.J.N., Schellens, M.H.B., van Engelsdorp Gastelaars, J., Jansen,  
463 M.D., van der Ende, A., Bogaert, D., Sanders, E.A.M., and Trzciński, K. (2014).

- 464 Streptococcus pneumoniae in saliva of Dutch primary school children. PLoS One 9,  
 465 e102045.
- 466 Wyllie, A.L., Fournier, J., Casanovas-Massana, A., Campbell, M., Tokuyama, M.,  
 467 Vijayakumar, P., Warren, J.L., Geng, B., Muenker, M.C., Moore, A.J., et al. (2020).  
 468 Saliva or Nasopharyngeal Swab Specimens for Detection of SARS-CoV-2. N. Engl. J.  
 469 Med. 383, 1283–1286.
- 470 Yapijakis, C., Panis, V., Koufaliotis, N., Yfanti, G., Karachalios, S., Roumeliotou, A., and  
 471 Mantzavinos, Z. (2006). Immunological and molecular detection of human  
 472 immunodeficiency virus in saliva, and comparison with blood testing. Eur. J. Oral Sci.  
 473 114, 175–179.
- 474 Yoon, J., Yun, S.G., Nam, J., Choi, S.-H., and Lim, C.S. (2017). The use of saliva  
 475 specimens for detection of influenza A and B viruses by rapid influenza diagnostic tests.  
 476 J. Virol. Methods 243, 15–19.

**Table 1. Demographic characteristics of the participants from the pilot study and the at-home collection kit study.**

| Category               | Pilot study (n=30)<br>n (%) | At-home kit (n=60) |                   |                    |
|------------------------|-----------------------------|--------------------|-------------------|--------------------|
|                        |                             | Overall (%)        | Bulb (%<br>n= 31) | Funnel (%<br>n=29) |
| <b>Sex</b>             |                             |                    |                   |                    |
| <i>Male</i>            | 11 (37)                     | 28 (47)            | 14 (45)           | 14 (48)            |
| <i>Female</i>          | 19 (63)                     | 32 (53)            | 17 (55)           | 15 (52)            |
| <b>Age</b>             |                             |                    |                   |                    |
| 18-29                  | 7 (23)                      | 13 (22)            | 7 (23)            | 6 (21)             |
| 30-39                  | 16 (53)                     | 27 (45)            | 11 (35)           | 16 (16)            |
| 40-49                  | 4 (13)                      | 5 (8)              | 4 (13)            | 1 (3)              |
| 50-59                  | 0 (0)                       | 5 (8)              | 3 (10)            | 2 (7)              |
| 60-69                  | 1 (3)                       | 6 (10)             | 4 (13)            | 2 (7)              |
| 70+                    | 2 (7)                       | 4 (7)              | 2 (6)             | 2 (7)              |
| <b>Education</b>       |                             |                    |                   |                    |
| <i>High School/GED</i> | 2 (7)                       | 15 (25)            | 9 (29)            | 6 (21)             |
| <i>Bachelors</i>       | 7 (23)                      | 21 (35)            | 11 (35)           | 10 (34)            |

|                               |         |         |         |         |
|-------------------------------|---------|---------|---------|---------|
| <i>Masters</i>                | 10 (33) | 11 (18) | 7 (23)  | 4 (14)  |
| <i>PhD/MD</i>                 | 11 (37) | 13 (22) | 4 (13)  | 9 (31)  |
| <b>Race</b>                   |         |         |         |         |
| <i>Black/African American</i> | 4 (13)  | 10 (17) | 6 (19)  | 4 (14)  |
| <i>Hispanic/Latino</i>        | 4 (13)  | 10 (17) | 5 (16)  | 5 (17)  |
| <i>Asian/South Asian</i>      | 6 (20)  | 7 (12)  | 4 (13)  | 3 (10)  |
| <i>White</i>                  | 15 (50) | 33 (55) | 16 (52) | 17 (59) |
| <i>Native American</i>        | 1 (3)   | 0 (0)   | 0       | 0       |



**Table 2. Participant observations and experiences with the unobserved collection.** Survey comments from participants from pilot study and the at-home collection kits. The comments presented here are representative but not exhaustive. *Abbreviations:* No. = number.

| <b>Comments from Pilot study</b>                                                                                                                                                           |                                                                                                                                                                                                                                                                                                                                                                                                                               |                                                                                        |                                                          |
|--------------------------------------------------------------------------------------------------------------------------------------------------------------------------------------------|-------------------------------------------------------------------------------------------------------------------------------------------------------------------------------------------------------------------------------------------------------------------------------------------------------------------------------------------------------------------------------------------------------------------------------|----------------------------------------------------------------------------------------|----------------------------------------------------------|
| <b>Funnel</b>                                                                                                                                                                              | <b>Bulb Pipette</b>                                                                                                                                                                                                                                                                                                                                                                                                           | <b>Pipette tip</b>                                                                     | <b>Collection Aid</b>                                    |
| "Very easy!"                                                                                                                                                                               | "Least favorite."                                                                                                                                                                                                                                                                                                                                                                                                             | "Easiest so far."                                                                      | "Liked the most."                                        |
| "Huge tube but clean."                                                                                                                                                                     | "Lots of work for what felt like little yield."                                                                                                                                                                                                                                                                                                                                                                               | "Messy."                                                                               | "Was a little gross"                                     |
| "I think this is the best one."                                                                                                                                                            | "Fav[orite] and way quickest method."                                                                                                                                                                                                                                                                                                                                                                                         | "Bubbled up not sure what to do."                                                      | "Most difficult."                                        |
| "Slow."                                                                                                                                                                                    | "It solved the spilling issue but created too much bubbles which makes it difficult to fillfull [sic] the amount."                                                                                                                                                                                                                                                                                                            | "The saliva was getting stuck at the pipette tip making it difficult to pass through." | "Easiest."                                               |
| "2nd easiest."                                                                                                                                                                             | "Kept suctioning in mouth instead of saliva, created bubbles and did not collect saliva [efficiently]."                                                                                                                                                                                                                                                                                                                       | "Least fav[orite] collection [because] saliva go [sic] everywhere"                     | "Favorite collection method but risk of saliva dribble." |
| <b>Comments from at-home collection kits</b>                                                                                                                                               |                                                                                                                                                                                                                                                                                                                                                                                                                               |                                                                                        |                                                          |
| <b>Funnel</b>                                                                                                                                                                              | <b>Bulb Pipette</b>                                                                                                                                                                                                                                                                                                                                                                                                           |                                                                                        |                                                          |
| "No clear step to unscrew the collection tube and attach the funnel."                                                                                                                      | "I wanted pictures for each step to make sure I was doing it right."<br>"The directions were not clear at all."<br>"It should have been made clear that the specimen goes in the box and then the package."<br>"The font was too tiny, impossible to read...Transferring the saliva from the pipette to the little tube was challenging (the tube opening was too small)."<br>"The font in the instructions could be larger." |                                                                                        |                                                          |
| "The directions never said to take off the cap to the tube."                                                                                                                               |                                                                                                                                                                                                                                                                                                                                                                                                                               |                                                                                        |                                                          |
| "It took me a little bit to understand that the sample goes back in the box and then goes in the [FEDEX] bag. Also, it never specifically said to unscrew the tube and attach the funnel." |                                                                                                                                                                                                                                                                                                                                                                                                                               |                                                                                        |                                                          |
| "[I] had to collect a lot of saliva (half of a large tube) - that took a while. The font in the instructions could be larger."                                                             |                                                                                                                                                                                                                                                                                                                                                                                                                               |                                                                                        |                                                          |

**(a) Participant survey**

| General questions                                                                                            | 1 Strongly disagree | 2 | 3 | 4 | 5 Strongly agree | Comment |
|--------------------------------------------------------------------------------------------------------------|---------------------|---|---|---|------------------|---------|
| Did you understand all the instructions prior to collecting the sample?                                      |                     |   |   |   |                  |         |
| Did you wash your hands properly before and after collecting the sample?                                     |                     |   |   |   |                  |         |
| Did you understand that you could not eat/drink/smoke prior to collecting the sample?                        |                     |   |   |   |                  |         |
| Did you understand that eating/drinking/smoking prior to collecting the sample might get false results?      |                     |   |   |   |                  |         |
| Did you know what to do if you had any questions during the sample collection?                               |                     |   |   |   |                  |         |
| Did you know how much saliva to put in the tube?                                                             |                     |   |   |   |                  |         |
| Collection device feed-back (name of device):                                                                | 1 Strongly disagree | 2 | 3 | 4 | 5 Strongly agree | Comment |
| Did you read all the instructions carefully prior to collecting the sample?                                  |                     |   |   |   |                  |         |
| Did you feel that you needed help while collecting your sample?                                              |                     |   |   |   |                  |         |
| Do you feel confident that you collected the sample properly?                                                |                     |   |   |   |                  |         |
| Did sample collection cause you physical discomfort?                                                         |                     |   |   |   |                  |         |
| Was collecting the sample difficult in general?                                                              |                     |   |   |   |                  |         |
| Was it difficult to put the appropriate amount of saliva into the tube?                                      |                     |   |   |   |                  |         |
| Did you get any saliva on the outside of the collection tube?                                                |                     |   |   |   |                  |         |
| Did you know what to do if saliva came into contact with the outside of the collection tube?                 |                     |   |   |   |                  |         |
| Did you understand that if you did not follow the procedure exactly, you might get a false result?           |                     |   |   |   |                  |         |
| Did the instructions clearly explain how to collect the sample? If no, which part was not clearly explained. |                     |   |   |   |                  |         |

**(b) Observer survey**

| Observer questions (NAME OF DEVICE):                                                             | 1 Strongly disagree | 2 | 3 | 4 | 5 Strongly agree | Comment |
|--------------------------------------------------------------------------------------------------|---------------------|---|---|---|------------------|---------|
| Study identifier:                                                                                |                     |   |   |   |                  |         |
| Did the study participant read the instructions?                                                 |                     |   |   |   |                  |         |
| Did the study participant appear confident in their ability to follow the instructions?          |                     |   |   |   |                  |         |
| Did the study participant properly wash their hands before and after sample collection?          |                     |   |   |   |                  |         |
| Did the study participant appear to properly follow instructions for sample collection set up?   |                     |   |   |   |                  |         |
| Did the study participant appear to properly follow instructions for adequate sample collection? |                     |   |   |   |                  |         |
| Did the study participant dispose of the collection device as advised?                           |                     |   |   |   |                  |         |
| Did the study participant collect a sufficient volume of saliva?                                 |                     |   |   |   |                  |         |
| Did the study participant securely fasten the collection tube?                                   |                     |   |   |   |                  |         |
| Did the study participant clean down the outside of the sample tube following collection?        |                     |   |   |   |                  |         |
| Did the study participant properly store their sample in the biohazard bag after collection?     |                     |   |   |   |                  |         |
| Did the study participant appear to struggle with any particular step? If so, explain which.     |                     |   |   |   |                  |         |

**(c) Laboratory survey**

| Collection device:                                                                            | 1 Strongly disagree | 2 | 3 | 4 | 5 Strongly agree | Comment |
|-----------------------------------------------------------------------------------------------|---------------------|---|---|---|------------------|---------|
| Study identifier:                                                                             |                     |   |   |   |                  |         |
| The sample was of sufficient volume (200-500 ul)                                              |                     |   |   |   |                  |         |
| The sample was easy to pipette                                                                |                     |   |   |   |                  |         |
| The sample was normal, true saliva                                                            |                     |   |   |   |                  |         |
| The sample was free from food particles                                                       |                     |   |   |   |                  |         |
| The sample was not unusually discolored                                                       |                     |   |   |   |                  |         |
| The sample tested positive for human RNase P in a range of 23-28 Ct                           |                     |   |   |   |                  |         |
| The sample tested positive for SARS-CoV-2                                                     |                     |   |   |   |                  |         |
| If the sample tested positive for SARS-CoV-2, this was reported back to the study participant |                     |   |   |   |                  |         |

**Figure S1 Survey questions posed to participants, observers, and laboratory personnel.** For the pilot study, parts a), b) and c) were used. For the at-home collection kit, only a) and c) were used. Responses were given on a scale of 1 (strongly disagree) to 5 (strongly agree).

**Table S1 Internal reliability of survey question measured with Cronbach's alpha.**

| Survey   | Question No. | alpha  | Question text                                                                                  |
|----------|--------------|--------|------------------------------------------------------------------------------------------------|
| Observer | 1            | 0.3799 | <i>Did the study participant read the instructions?</i>                                        |
|          | 2            | 0.9684 | <i>Did the study participant appear confident in their ability to follow the instructions?</i> |
|          | 3            | 0.5534 | <i>Did the study participant properly wash their hands before and after sample collection?</i> |

|             |    |        |                                                                                                           |
|-------------|----|--------|-----------------------------------------------------------------------------------------------------------|
|             | 4  | 0.4434 | <i>Did the study participant appear to properly follow instructions for sample collection set up?</i>     |
|             | 5  | 0.8518 | <i>Did the study participant appear to properly follow instructions for adequate sample collection?</i>   |
|             | 8  | 0.8256 | <i>Did the study participant securely fasten the collection tube?</i>                                     |
|             | 9  | 0.6961 | <i>Did the study participant clean down the outside of the sample tube following collection?</i>          |
|             | 10 | 0.8208 | <i>Did the study participant properly store their sample in the biohazard bag after collection?</i>       |
|             | 11 | 0.4703 | <i>Did the study participant appear to struggle with any particular step? If so, explain which.</i>       |
| Participant | 1  | 0.5617 | <i>Did you read all the instructions carefully prior to collecting the sample?</i>                        |
|             | 2  | 0.7480 | <i>Did you feel that you needed help while collecting your sample?</i>                                    |
|             | 3  | 0.5382 | <i>Do you feel confident that you collected the sample properly?</i>                                      |
|             | 4  | 0.4737 | <i>Did sample collection cause you physical discomfort?</i>                                               |
|             | 5  | 0.2517 | <i>Was collecting the sample difficult in general?</i>                                                    |
|             | 6  | 0.2229 | <i>Was it difficult to put the appropriate amount of saliva into the tube?</i>                            |
|             | 7  | 0.2251 | <i>Did you get any saliva on the outside of the collection tube?</i>                                      |
|             | 8  | 0.7217 | <i>Did you know what to do if saliva came into contact with the outside of the collection tube?</i>       |
|             | 9  | 0.9411 | <i>Did you understand that if you did not follow the procedure exactly, you might get a false result?</i> |
|             | 10 | 0.9121 | <i>Did the instructions clearly explain how to collect the sample?</i>                                    |
| Laboratory  | 1  | 0      | <i>The sample was of sufficient volume (200-500 ul)</i>                                                   |
|             | 2  | 1      | <i>The sample was easy to pipette</i>                                                                     |
|             | 3  | 1      | <i>The sample was normal, true saliva</i>                                                                 |
|             | 4  | 1      | <i>The sample was free from food particles</i>                                                            |
|             | 5  | 0.916  | <i>The sample was not unusually discolored</i>                                                            |

**(a) Participant survey responses**

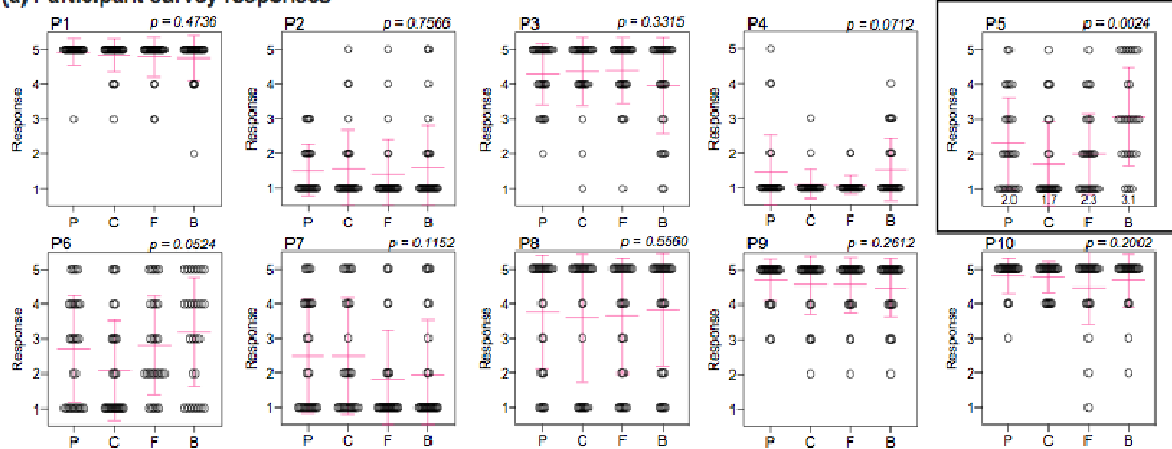

**(b) Observer survey responses**

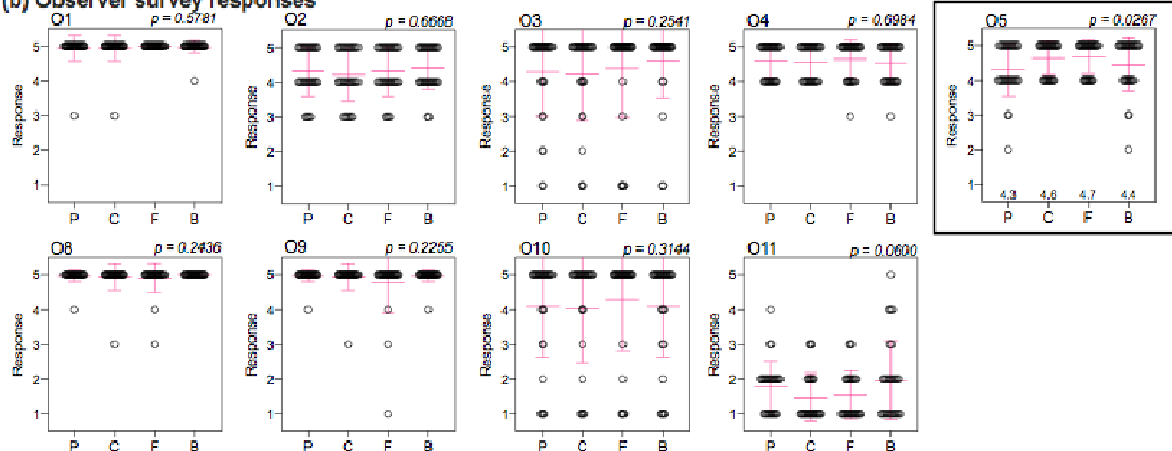

**Figure S2 Responses to participant and observer surveys (related to Figure 1)..** Mean and standard deviation are marked in pink. Survey data were analyzed using one-way ANOVA. Responses to two questions (P5 and O5) differed significantly across devices and are denoted with black boxes. The numbers shown on the x-axis of those graphs are the mean response value. *Abbreviations: P = pipette tip, C = collection aid, F = funnel, B = bulb pipette.*

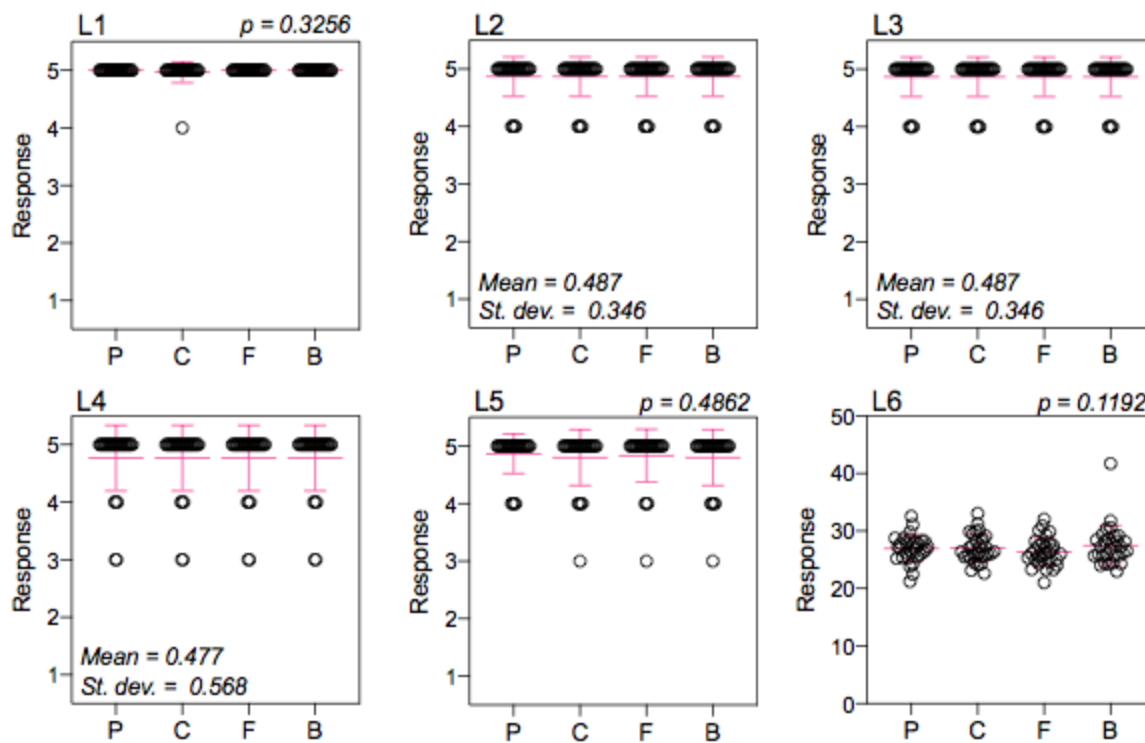

**Figure S3 Responses to laboratory survey. P-values are shown for questions that could be assessed using one-way ANOVA. Mean and standard deviation (st. dev.) are shown for questions where responses were identical across devices. Abbreviations: P = pipette tip, C = collection aid, F = funnel, B = bulb pipette.**

**Table S2: The majority of internally reliable survey questions did not differ significantly across collection devices. (a) Analysis of responses for participant and observer survey questions found to be internally reliable with Cronbach's alpha. (b) Analysis of laboratory survey responses. P-values indicate the result of one-way ANOVA. Mean and standard deviation were reported for questions in which the response distribution was identical across devices. Abbreviations: No. = number, st. dev. = standard deviation**

| a)          | Survey | Question No. | P-value |
|-------------|--------|--------------|---------|
| Observer    |        | 2            | 0.6668  |
|             |        | 3            | 0.2541  |
|             |        | 5*           | 0.0267  |
|             |        | 8            | 0.2436  |
|             |        | 9            | 0.2256  |
|             |        | 10           | 0.3144  |
| Participant |        | 1            | 0.4736  |
|             |        | 2            | 0.7566  |
|             |        | 3            | 0.3315  |
|             |        | 8            | 0.5560  |
|             |        | 9            | 0.2612  |
|             |        | 10           | 0.2002  |

| b) | Question No. | Statistic       | Value        |
|----|--------------|-----------------|--------------|
|    | 1            | P-value         | 0.3256       |
|    | 2            | Mean (st. dev.) | 4.87 (0.346) |
|    | 3            | Mean (st. dev.) | 4.87 (0.346) |
|    | 4            | Mean (st. dev.) | 4.77 (0.568) |
|    | 5            | P-value         | 0.4862       |
|    | 6            | P-value         | 0.1192       |

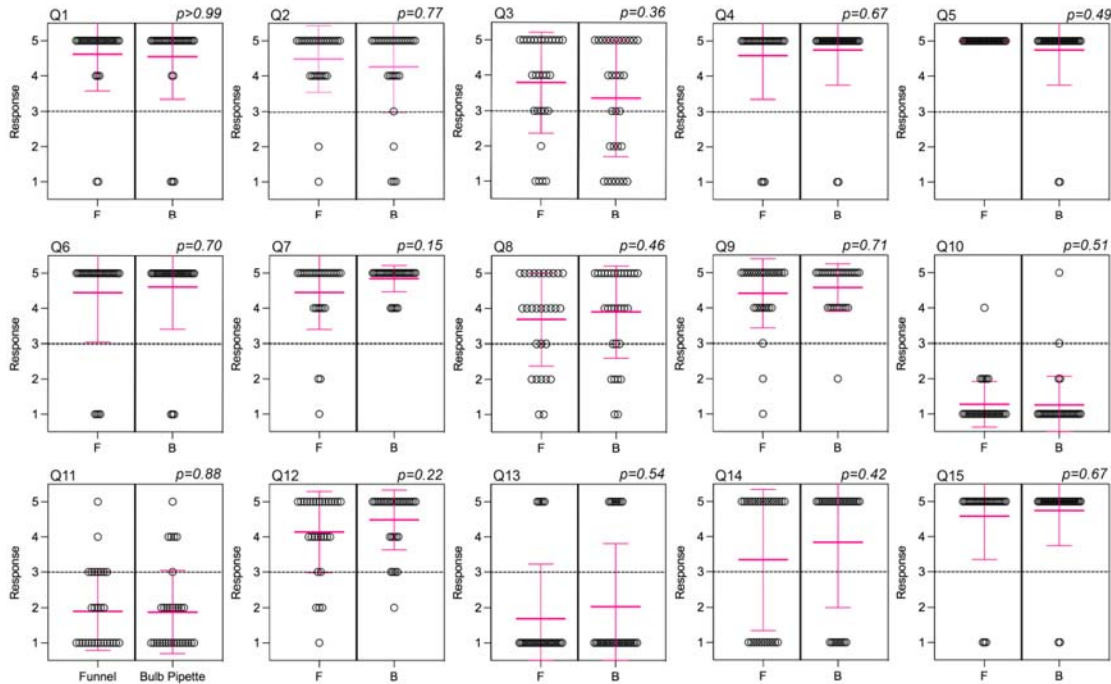

**Figure S4: Responses to participant surveys for at home collection kit.** Mean and standard deviation are marked in pink. Survey data were analyzed using Mann-Whitney.  $P < 0.05$  is significantly different. Abbreviations: F = funnel, B = bulb pipette.

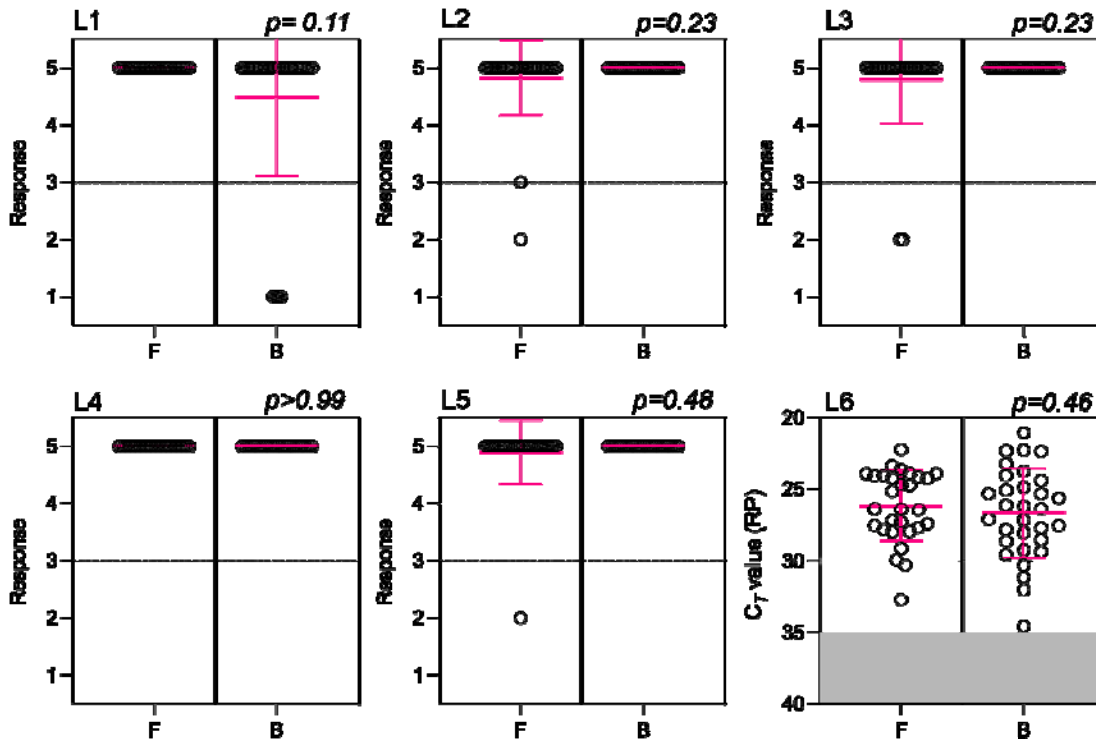



**Figure S5 Responses to laboratory survey.** Mean and standard deviation are marked in pink. P-values are shown for questions that could be assessed using Mann-Whitney. Ct values over 35 are considered invalid and are highlighted in gray on L6. *Abbreviations: F = funnel, B = bulb pipette*
